# Supplementary material for: A mathematical modeling and optimal control analysis of the effect of treatment-seeking behaviors on the spread of malaria
Source: Frontiers journal article supplement (doi:10.3389/fams.2025.1552384), 2025-03-21
Supplement: Data_Sheet_1.docx [file Data_Sheet_1.docx]

# **Appendix 1**

,

,

Where, i.e.
